# Supplementary material
Source: PubMed Central journal article supplement (PMC2940322)
Supplement: NIHMS229023-supplement-01.pdf [file NIHMS229023-supplement-01.pdf]

| Ratio log2 | TTEST   | Gene Name     | Function                                   |
|------------|---------|---------------|--------------------------------------------|
| 1.421      | 0.00048 | Chac1         | UPR                                        |
| 1.263      | 0.00081 | Derl3         | UPR                                        |
| 1.256      | 0.03297 | Rtp4          | opiod receptor                             |
| 1.252      | 0.00047 | Trib3         | UPR                                        |
| 1.241      | 0.04811 | Esm1          | Immunity/sepsis                            |
| 1.195      | 0.00045 | Nupr1         | ER-stress/DNA-repair                       |
| 1.188      | 0.00563 | Slc7a1        | cationic amino acid transporter            |
| 1.172      | 0.03451 | Upk3b         |                                            |
| 1.162      | 0.01369 | Slc7a3        | cationic amino acid transporter            |
| 1.161      | 0.00227 | Ddit3         | ER-stress                                  |
| 1.143      | 0.00288 | Aldh1l2       |                                            |
| 1.142      | 0.02999 | Slc1a4        | glutamate/neutral amino acid transporter   |
| 1.135      | 0.01323 | Insig1        | HMG-Coa regulation                         |
| 1.125      | 0.01359 | Idi1          | isopentenyl-diphosphate isomerase          |
| 1.124      | 0.00284 | Herpud1       | ER-stress                                  |
| 1.124      | 0.01424 | Lss           | lanosterol synthase                        |
| 1.122      | 0.00574 | Slc2a6        | facilitated glucose transporter            |
| 1.122      | 0.00105 | Ttc17         |                                            |
| 1.118      | 0.00186 | Kcnj8         | potassium inwardly-rectifying channel      |
| 1.117      | 0.00571 | Hmgcs1        | HMG-Coa 2                                  |
| 1.117      | 0.00472 | Slc6a9        | neurotransmitter transporter               |
| 1.113      | 0.00589 | Bhlhb8        | seminal vesicle epithelium differentiation |
| 1.113      | 0.00875 | Ero1b         | UPR                                        |
| 1.112      | 0.04184 | Cep135        | centriole biogenesis                       |
| 1.112      | 0.00052 | Olf430        | olfactory receptor                         |
| 1.110      | 0.00096 | Sdf2l1        | ER-stress                                  |
| 1.110      | 0.04832 | Cyp51         | cholesterol biosynthesis                   |
| 1.107      | 0.01452 | Lpin1         | glycerolipid biosynthesis                  |
| 1.105      | 0.00926 | AK138790      |                                            |
| 1.105      | 0.00416 | CJ042244      |                                            |
| 1.105      | 0.00046 | 9030617O03Rik |                                            |
| 1.103      | 0.04668 | Sc4mol        | cholesterol biosynthesis                   |
| 1.103      | 0.04538 | Rsad2         |                                            |
| 1.102      | 0.01337 | Gpt2          |                                            |
| 1.101      | 0.00301 | Cng2          |                                            |
| 1.101      | 0.03025 | Prkg1         | protein kinase                             |
| 1.100      | 0.03283 | Robo4         | guidance receptor/angiogenesis             |
| 1.100      | 0.00092 | Nucb2         |                                            |
| 1.100      | 0.00002 | D12Erd647e    |                                            |
| 1.099      | 0.01947 | Dusp26        |                                            |
| 1.099      | 0.01222 | Hyou1         | UPR-ER Stress                              |
| 1.098      | 0.00733 | Afp           | fetal counterpart of serum albumin         |
| 1.098      | 0.00601 | Ppp1r3c       | glycogen metabolism.                       |
| 1.098      | 0.01834 | Kcne3         | potassium voltage-gated channel            |
| 1.097      | 0.00786 | Mbnl2         |                                            |
| 1.095      | 0.01065 | Lama4         | basement membranes                         |
| 1.095      | 0.00509 | Armcx3        |                                            |
| 1.094      | 0.00229 | Dnajb9        | ER stress-UPR                              |
| 1.094      | 0.01227 | Ldlr          | Cholesterol transport                      |
| 1.093      | 0.01125 | Sc5d          | sterol-C5-desaturase                       |
| 1.093      | 0.00128 | H2-M3         | histocompatibility 2, M region locus 3     |
| 1.092      | 0.01341 | AI595406      |                                            |
| 1.091      | 0.00326 | Sesn2         |                                            |
| 1.091      | 0.00083 | Idh1          | isocitrate dehydrogenase 1                 |
| 1.091      | 0.01825 | Dnajc3        | ER-stress- UPR                             |
| 1.091      | 0.02041 | Gsbs          |                                            |
| 1.090      | 0.00043 | Vldlr         | Cholesterol transport                      |

**Table S1. Related to Figure 4**

Transcripts ranked by the order of expressions most increase in E8.5 *Srd5a3*<sup>Gt/Gt</sup>. Ratio of log2 of the expression are means of 4 replicates experiment. All transcripts listed here were significantly increased (P<0.05). Genes involved in ER stress or UPR are in green, genes involved in the mevalonate pathway are in yellow.

| Ratio log2 | TTEST   | Gene Name     | Gene title                                                 |
|------------|---------|---------------|------------------------------------------------------------|
| 0.73       | 0.00041 | Srd5a3        | steroid 5 alpha-reductase 3                                |
| 0.82       | 0.00345 | Pi4k2b        | Phosphatidylinositol 4-kinase type 2 beta                  |
| 0.84       | 0.03075 | Abhd1         | Abhydrolase domain containing 1                            |
| 0.85       | 0.00339 | Hspa1a        | Heat shock protein 1A                                      |
| 0.85       | 0.00124 | Hspa1b        | Heat shock protein 1B                                      |
| 0.90       | 0.01162 | T             | Brachyury                                                  |
| 0.90       | 0.00992 | 3732412D22Rik |                                                            |
| 0.90       | 0.00772 | A230097K15Rik | Interferon stimulated exonuclease gene 20-like 1           |
| 0.91       | 0.00016 | Isg20l1       |                                                            |
| 0.91       | 0.00604 | 5730593N15Rik |                                                            |
| 0.91       | 0.03364 | 5730437N04Rik |                                                            |
| 0.92       | 0.03754 | C330024D21Rik |                                                            |
| 0.92       | 0.02911 | Ubap2l        | Ubiquitin associated protein 2-like                        |
| 0.92       | 0.00005 | Rangap1       | RAN GTPase activating protein 1                            |
| 0.92       | 0.01860 | Tagln         | Transgelin                                                 |
| 0.92       | 0.02285 | Cldn4         | Claudin 4                                                  |
| 0.93       | 0.02943 | Pnpla6        | Patatin-like phospholipase domain containing 6             |
| 0.93       | 0.00934 | Trip10        | Thyroid hormone receptor interactor 10                     |
| 0.93       | 0.02331 | Fgf3          | Fibroblast growth factor 3                                 |
| 0.93       | 0.00528 | E030010A14Rik |                                                            |
| 0.93       | 0.00216 | Smo           | Smoothened                                                 |
| 0.93       | 0.00663 | Cpa2          | Carboxypeptidase A2                                        |
| 0.93       | 0.02163 | Evx1          | Even skipped homeotic gene 1                               |
| 0.93       | 0.04052 | Tomm40        | Translocase of outer mitochondrial membrane 40 homolog     |
| 0.93       | 0.00535 | Strn4         | Striatin, calmodulin binding protein 4                     |
| 0.93       | 0.00050 | Tnfrsf19l     | Tumor necrosis factor receptor superfamily, member 19-like |
| 0.93       | 0.04161 | Rnd2          | Rho family GTPase 2                                        |
| 0.93       | 0.00516 | Ttll4         | Tubulin tyrosine ligase-like family, member 4              |
| 0.93       | 0.00023 | E2f1          | E2F transcription factor 1                                 |
| 0.93       | 0.00369 | Pim1          | Proviral integration site 1                                |

### Table S2. Related to Figure 4

Transcripts ranked by the order of expressions most decrease in E8.5 *Srd5a3*<sup>Giv/Gt</sup>. Ratio of log2 of the expression are means of 4 replicates experiment. All transcripts listed here were significantly increased (P<0.05).

**Biological Process associated with over-expressed genes according to their gene ontology (GO) category**

| GO Term                                     | P-value  | Sample frequency |
|---------------------------------------------|----------|------------------|
| GO:0051789 response to protein stimulus     | 8.25E-10 | 23/923 (2.5%)    |
| GO:0006986 response to unfolded protein     | 1.66E-08 | 16/923 (1.7%)    |
| GO:0016126 sterol biosynthetic process      | 8.88E-08 | 15/923 (1.6%)    |
| GO:0006695 cholesterol biosynthetic process | 4.88E-07 | 13/923 (1.4%)    |
| GO:0008610 lipid biosynthetic process       | 2.54E-04 | 37/923 (4.0%)    |
| GO:0006694 steroid biosynthetic process     | 8.13E-04 | 17/923 (1.8%)    |
| GO:0016125 sterol metabolic process         | 9.91E-04 | 17/923 (1.8%)    |
| GO:0044237 cellular metabolic process       | 5.78E-03 | 372/923 (40.3%)  |
| GO:0008203 cholesterol metabolic process    | 8.00E-03 | 428/923 (46.4%)  |

**Biological Process associated with under-expressed genes according to their GO category**

| GO Term                                                                          | P-value  | Sample frequency |
|----------------------------------------------------------------------------------|----------|------------------|
| GO:0044237 cellular metabolic process                                            | 2.72E-12 | 362/775 (46.7%)  |
| GO:0008152 metabolic process                                                     | 2.49E-11 | 407/775 (52.5%)  |
| GO:0044238 primary metabolic process                                             | 2.45E-10 | 364/775 (47.0%)  |
| GO:0034960 cellular biopolymer metabolic process                                 | 3.99E-09 | 284/775 (36.6%)  |
| GO:0044260 cellular macromolecule metabolic process                              | 5.97E-09 | 289/775 (37.3%)  |
| GO:0043170 macromolecule metabolic process                                       | 5.46E-08 | 310/775 (40.0%)  |
| GO:0043283 biopolymer metabolic process                                          | 1.13E-07 | 301/775 (38.8%)  |
| GO:0006807 nitrogen compound metabolic process                                   | 4.68E-06 | 213/775 (27.5%)  |
| GO:0006139 nucleobase, nucleoside, nucleotide and nucleic acid metabolic process | 1.39E-05 | 196/775 (25.3%)  |
| GO:0009792 embryonic development ending in birth or egg hatching                 | 1.22E-04 | 45/775 (5.8%)    |
| GO:0034470 ncRNA processing                                                      | 2.03E-04 | 22/775 (2.8%)    |
| GO:0043009 chordate embryonic development                                        | 2.55E-04 | 44/775 (5.7%)    |
| GO:0048519 negative regulation of biological process                             | 3.12E-04 | 88/775 (11.4%)   |
| GO:0006396 RNA processing                                                        | 3.49E-04 | 42/775 (5.4%)    |
| GO:0034660 ncRNA metabolic process                                               | 5.30E-04 | 25/775 (3.2%)    |
| GO:0048523 negative regulation of cellular process                               | 9.38E-04 | 79/775 (10.2%)   |
| GO:0009888 tissue development                                                    | 2.51E-03 | 58/775 (7.5%)    |
| GO:0009790 embryonic development                                                 | 4.13E-03 | 57/775 (7.4%)    |
| GO:0003002 regionalization                                                       | 4.24E-03 | 27/775 (3.5%)    |
| GO:0040007 growth                                                                | 6.70E-03 | 36/775 (4.6%)    |

**Table S3. Related to Figure 4**

Enrichment of Gene Ontology (GO) categories by differentially expressed genes in *Srd5a3*<sup>Gt/Gt</sup> embryos compared to wt litter mates.

Genes enriched in the GO category Response to unfolded protein (2<sup>nd</sup> line of the GO term) are also present in the GO category Response to protein stimulus (1<sup>st</sup> line of the GO term) where they represent 70% of the genes enriched in this last category.
